# Supplementary material for: Heterogeneity of the Relative Benefits of TICI 2c/3 over TICI 2b50/2b67: Are there Patients who are less Likely to Benefit?
Source: PubMed Central journal article supplement (PMC9424153; doi:10.1007/s00062-021-01131-0), 2022-01-06
Supplement: 62_2021_1131_MOESM1_ESM.pdf [file 62_2021_1131_MOESM1_ESM.pdf]

**Heterogeneity of the relative benefits of TICI 2c/3 over TICI 2b50/2b67: Are there Patients which are less likely to benefit?**

**ONLINE SUPPLEMENT**

**Supplementary Table I**

|                                | <b>NIHSS <math>\leq</math> 9<br/>(n=235)</b> | <b>NIHSS 10-19<br/>(n=447)</b> | <b>NIHSS <math>\geq</math> 20<br/>(n=221)</b> | <b>p</b> |
|--------------------------------|----------------------------------------------|--------------------------------|-----------------------------------------------|----------|
| <b>ASITN/SIR DSA score (%)</b> |                                              |                                |                                               | <0.001   |
| <b>0</b>                       | 3 (1.3)                                      | 27 (6.0)                       | 31 (14.0)                                     |          |
| <b>1</b>                       | 43 (18.3)                                    | 198 (44.3)                     | 114 (51.6)                                    |          |
| <b>2</b>                       | 61 (26.0)                                    | 135 (30.2)                     | 54 (24.4)                                     |          |
| <b>3</b>                       | 116 (49.4)                                   | 85 (19)                        | 20 (9.0)                                      |          |
| <b>4</b>                       | 12 (5.1)                                     | 2 (0.4)                        | 2 (0.9)                                       |          |

*ASITN/SIR* American Society of Intervention and Therapeutic Neuroradiology/Society of Interventional Radiology, *DSA* Digital subtraction angiography
